# Supplementary material for: A Meta-Analysis of Glasgow Prognostic Score and Modified Glasgow Prognostic Score as Biomarkers for Predicting Survival Outcome in Renal Cell Carcinoma
Source: Front Oncol. 2020 Sep 17;10:1541. doi: 10.3389/fonc.2020.01541 (PMC7527435; doi:10.3389/fonc.2020.01541)
Supplement: Supplementary file 3 [file Data_Sheet_2.XLSX]

## Sheet: table1
Table 1. Characteristics of included studies
Study /Published year	Nation /Region	Study type /Date	Tumor	Treatment	no. of patients	Male/Female	Mean Age (range)/yr	GPS/mGPS	Score	Outcomes	Follow-up(range)/mo	NOS score
Ramsey2007	UK/Europe	cohort /2001-2005	mRCC	Immunotherapy	119	85/35	60	GPS	0: 33(27.7%) 1: 72(60.5%) 2: 14(11.8%)	CSS	10	8
Ramsey2008	UK/Europe	cohort /May2005-Feb2006	mRCC	Immunotherapy	23	18/5	60	GPS	0: 8 (34.8%) 1: 9 (39.1%) 2: 6(26.1%)	CSS	23	6
Qayyum2012	UK/Europe	cohort /NA	ccRCC	surveillance	79	47/32	60(39–82)	mGPS	0: 57(72.2%) 1: 19(24.0%) 2: 3 (3.8%)	CSS	93(0.1–152)	6
Lamb2012	UK/Europe	cohort /Mar.1997-Jul.2007	ccRCC	Surgery	169	107/62	60	mGPS	0: 117(69.2%) 1: 46 (27.2%) 2: 6 (3.6%)	OS; CSS	98	8
Tai2014	USA /North America	cohort /Nov.2006-Jan.2008	ccRCC	Surgery	129	83/46	62.0(54.0–70.0)	mGPS	0: 80(84.3%) 1: 27(9.8%) 2: 22(5.9%)	RFS	25.5(12.0–32.4)	7
Lucca2015	Austria/Europe	retrospective review /2002-2014	ccRCC	Surgery	430	257/173	65.5 (57–73)	GPS	0: 330(76.8%) 1: 87(20.2%) 2: 13(3.0%)	DFS	40(17–73)	7
Chen2015	China/Asia	retrospective review /2003-2012	ccRCC	Surgery	406	253/153	58(24–80)	mGPS/GPS	NA	OS	63 (1–151)	6
Baum2015	USA /North America	cohort /2005-2013	ccRCC	Surgery	352	NA	58.8	mGPS	0: 267(75.9%) 1: 38(10.8%) 2: 47(13.3%)	OS	31.6 (0.03–84)	6
Cho2016	South Korea/Asia	cohort /Jun.1994-Jul.2012	ccRCC	Surgery	388	263/125	56.0(18–81)	mGPS	0: 327(84.3%) 1: 38(9.8%) 2: 23(5.9%)	RFS; CSS	53.7 (4–215)	7
Ishihara2016	Japan/Asia	retrospective study /2007-2014	mRCC	medical therapy	71	50/21	64.0 (31–79)	mGPS	0: 53(74.6%) 1: 10(14.1%) 2: 8(11.3%)	OS; PFS	17.0 (2.24–65.6)	7
Tsujino2017	Japan/Asia	cohort /2005-2015	mRCC	Surgery	219	154/65	65.0±10.8	mGPS	0: 184(84.0%) 1: 20(9.1%) 2: 15(6.9%)	OS; CSS	57	7
Ohmura2017	Japan/Asia	retrospective study /Sept.2009~Aug.2015	RCC	Molecular-targeted drug	32	20/12	66 (33–82)	mGPS	0: 21(65.6%) 1: 3(9.4%) 2: 8(25.0%)	OS; PFS	NA	7
Lorentz2017	USA /North America	retrospective study /2006-2016	ccRCC	Surgery	117	NA	NA	mGPS	0: 38(32.3%) 1: 17(14.4%) 2: 62 (53.3%)	OS	12.6 (4.8–32.4)	6
Harris2017	Japan/Asia	cohort /Jul.2005-Jan.2015	mRCC	Targeted agent	181	144/37	63 (26–89)	mGPS	0: 92(50.8%) 1: 36(19.9%) 2: 53(29.3%)	OS	NA	6
Owari2018	Japan/Asia	retrospective study /Jan.2007~Dec.2016	RCC	surveillance	43	36/7	65.6±12.1	GPS	0: 25(58%) 1: 9(21%) 2: 9(21%)	CSS	108	6
Fukuda(1)2018	Japan/Asia	retrospective study /Jan.1986~Dec.2015	mRCC	Surgery	152	109/43	64.0 (61.5–64.8)	GPS	0: 47(31%) 1: 59(39%) 2: 46(30%)	OS	100	6
Fukuda(2)018	Japan/Asia	retrospective study /Mar.1984-Aug.2015	mRCC	Surgery	170	122/48	63.5 (61.4–64.5)	GPS	0: 56(33%) 1: 67(39%) 2: 47(28%)	OS	100	7
HR, hazard ratio; CI, confidence interval; OS, overall survival; RFS, recurrence-free survival; PFS, progression-free survival; CSS, cancer-specific survival ;RCC, renal cell cancer; mRCC, metastaticrenal renal cell cancer; ccRCC, clear cell renal cell cancer; NA, not available; GPS, Glasgow Prognostic Score; mGPS, modified Glasgow Prognostic Score
					2910

## Sheet: OS
study	year	tumor		hr	ll	ul	region	stage	mode	nation	outcomes
Lamb et al.(U)	2012	ccRCC		5.7	3.49	9.33	Europe	Non-metasiatic	mGPS	UK	OS
Lamb et al.(M)	2012	ccRCC		4.17	2.48	7.03	Europe	Non-metasiatic	mGPS	UK	OS
Chen et al.	2015	ccRCC	GPS/mGPS 0	reference			Asia	Non-metasiatic	mGPS	China	OS
Chen et al.(U)	2015	ccRCC	GPS 1	6.64	3.56	12.37	Asia	Non-metasiatic	mGPS	China	OS
Chen et al.(U)	2015	ccRCC	GPS 2	13.26	6.47	27.17	Asia	Non-metasiatic	mGPS	China	OS
Chen et al.(U)	2015	ccRCC	mGPS 1	5.3	2.65	10.59	Asia	Non-metasiatic	mGPS	China	OS
Chen et al.(U)	2015	ccRCC	mGPS 2	10.96	5.47	21.94	Asia	Non-metasiatic	mGPS	China	OS
Chen et al.(M)	2015	ccRCC	GPS 1	3.57	1.79	7.15	Asia	Non-metasiatic	mGPS	China	OS
Chen et al.(M)	2015	ccRCC	GPS 2	2.54	1.03	6.29	Asia	Non-metasiatic	mGPS	China	OS
Chen et al.(M)	2015	ccRCC	mGPS 1	2.98	1.36	6.53	Asia	Non-metasiatic	mGPS	China	OS
Chen et al.(M)	2015	ccRCC	mGPS 2	1.94	0.81	4.62	Asia	Non-metasiatic	mGPS	China	OS
Baum et al.	2015	ccRCC	mGPS 0	reference			Amarican	Non-metasiatic	mGPS	USA	OS
Baum et al.	2015	ccRCC	mGPS 1	3.6	1.57	8.23	Amarican	Non-metasiatic	mGPS	USA	OS
Ishihara et al.	2016	mRCC	mGPS 1	2.7	0.56	13.02	Asia	Metasiatic	mGPS	Japan	OS
Ishihara et al.	2016	mRCC	mGPS 2	20.8	4.49	89.93	Asia	Metasiatic	mGPS	Japan	OS
Tsujino et al.	2017	RCC	mGPS 1	18.39	4.35	77.84	Asia	Fixed	mGPS	Japan	OS
Tsujino et al.	2017	RCC	mGPS 2	71.54	10.9	469.55	Asia	Fixed	mGPS	Japan	OS
Ohmura et al.	2017	RCC	mGPS 2	2.36	1.49	3.77	Amarican	Non-metasiatic	mGPS	USA	OS
Lorentz et al.	2017	ccRCC	mGPS 1	3.23	0.32	32.99	Asia	Metasiatic	mGPS	Japan	OS
Lorentz et al.	2017	ccRCC	mGPS 2	2.45	0.81	7.36	Asia	Metasiatic	mGPS	Japan	OS
Harris et al.	2017	mRCC	mGPS 2	reference			Amarican	Metasiatic	mGPS	USA	OS
Harris et al(WCI).	2017	mRCC	mGPS 0	0.26	0.15	0.47	Amarican	Metasiatic	mGPS	USA	OS
Harris et al(WCI).	2017	mRCC	mGPS 1	0.95	0.5	1.79	Amarican	Metasiatic	mGPS	USA	OS
Harris et al(AVMC).	2017	mRCC	mGPS 0	0.25	0.1	0.65	Amarican	Metasiatic	mGPS	USA	OS
Harris et al(AVMC).	2017	mRCC	mGPS 1	0.4	0.14	1.12	Amarican	Metasiatic	mGPS	USA	OS
Fukuda(1) et al.	2018	mRCC	GPS 0	reference			Asia	Metasiatic	GPS	Japan	OS
Fukuda(1) et al.	2018	mRCC	GPS 1	1.89	1.12	3.21	Asia	Metasiatic	GPS	Japan	OS
Fukuda(1) et al.	2018	mRCC	GPS 2	3.54	2.07	6.14	Asia	Metasiatic	GPS	Japan	OS
Fukuda(2) et al.	2018	mRCC	GPS 0	reference			Asia	Metasiatic	GPS	Japan	OS
Fukuda(2) et al.	2018	mRCC	GPS 1	2.19	1.26	3.83	Asia	Metasiatic	GPS	Japan	OS
Fukuda(2) et al.	2018	mRCC	GPS 2	2.23	1.17	4.22	Asia	Metasiatic	GPS	Japan	OS

## Sheet: PFS
study	year	tumor		hr	ll	ul	region	stage	mode	nation	outcomes
Tai et al.	2014	ccRCC	mGPS 0	reference			Amarican	Non-metasiatic	mGPS	USA	RFS
Tai et al.	2014	ccRCC	mGPS 1 Crude	5.458	2.019	14.752	Amarican	Non-metasiatic	mGPS	USA	RFS
Tai et al.	2014	ccRCC	mGPS 2 Crude	19.973	8.78	45.436	Amarican	Non-metasiatic	mGPS	USA	RFS
Tai et al.	2014	ccRCC	mGPS 1 Adjusted	4.035	1.312	12.415	Amarican	Non-metasiatic	mGPS	USA	RFS
Tai et al.	2014	ccRCC	mGPS 2 Adjusted	7.012	2.126	23.123	Amarican	Non-metasiatic	mGPS	USA	RFS
Ishihara et al.	2016	mRCC	mGPS 1	1.98	1	3.92	Asia	Metasiatic	mGPS	Japan	PFS
Ishihara et al.	2016	mRCC	mGPS 2	5.92	2.36	14.83	Asia	Metasiatic	mGPS	Japan	PFS
Ohmura et al.	2017	RCC	mGPS 2	1.98	1.32	3.14	Asia	Non-metasiatic	mGPS	Japan	PFS
Cho et al.	2016	ccRCC	mGPS 1	8.37	2.25	31.12	Asia	Non-metasiatic	mGPS	south Korea	DFS
Cho et al.	2016	ccRCC	mGPS 2	28.44	5.81	14	Asia	Non-metasiatic	mGPS	south Korea	DFS
Lucca et al.	2015	ccRCC	GPS 1	5.85	3.13	10.83	Europe	Non-metasiatic	GPS	Austria	DFS
Lucca et al.	2015	ccRCC	GPS 2	7.89	2.67	23.27	Europe	Non-metasiatic	GPS	Austria	DFS

## Sheet: CSS
study	year	tumor		hr	ll	ul	region	stage	mode	nation	outcomes
Ramsey et al.	2007	mRCC	GPS1	1.97	0.69	5.16	Europe	Metasiatic	GPS	UK	CSS
Ramsey et al.	2007	mRCC	GPS2	4.19	1.42	12.37	Europe	Metasiatic	GPS	UK	CSS
Ramsey et al.	2008	mRCC	GPS	2.23	1.09	4.57	Europe	Metasiatic	GPS	UK	CSS
Qayyum et al.	2012	ccRCC	GPS1	3.57	0.22	7.71	Europe	Non-metasiatic	mGPS	UK	CSS
Lamb et al.	2012	ccRCC	mGPS1	7.67	0.88	67.06	Europe	Non-metasiatic	mGPS	UK	CSS
Lamb et al.	2012	ccRCC	mGPS2	459	1.25	很大	Europe	Non-metasiatic	mGPS	UK	CSS
Cho et al.	2016	ccRCC	mGPS1	1.46	0.1	20.44	Asia	Non-metasiatic	mGPS	south Korea	CSS
Cho et al.	2016	ccRCC	mGPS2	5.25	0.59	46.99	Asia	Non-metasiatic	mGPS	south Korea	CSS
Tsujino et al.	2017	RCC	mGPS 1	13.34	0.62	34	Asia	Fixed	mGPS	Japan	CSS
Tsujino et al.	2017	RCC	mGPS 2	32.06	2.52	407.56	Asia	Fixed	mGPS	Japan	CSS
Owari et al.	2018	mRCC	GPS 0	reference			Asia	Metasiatic	GPS	Japan	CSS
Owari et al.(U)	2018	mRCC	GPS 1	2.7	1.56	4.8	Asia	Metasiatic	GPS	Japan	CSS
Owari et al.(U)	2018	mRCC	GPS 2	5.5	1.6	19.1	Asia	Metasiatic	GPS	Japan	CSS
Owari et al.(M)	2018	mRCC	GPS 1	1.8	1.04	2.99	Asia	Metasiatic	GPS	Japan	CSS
Owari et al.(M)	2018	mRCC	GPS 2	3.5	1.68	7.4	Asia	Metasiatic	GPS	Japan	CSS

## Sheet: NOS
	Quality indicators from Newcastle-Ottawa Scale								scores
	1	2	3	4	5	6	7	8
Ramsey2006	★	★	★	★	★★	\	★	★	8
Ramsey2008	★	★	\	\	★★	\	★	★	6
Qayyum2012	\	\	★	★	★★	\	★	★	6
Lamb2012	★	\	★	★	★★	★	★	★	8
Tai2014	★	★	★	★	★	\	★	★	7
Lucca2015	★	\	★	★	★★	★	\	★	7
Chen2015	★	\	★	\	★★	\	★	★	6
Baum2015	★	★	★	★	★	\	★	\	6
Cho2016	\	\	★	★	★★	★	★	★	7
Ishihara2016	★	★	★	\	★★	★	\	★	7
Fukuda2017	★	★	★	★	★	★	\	★	7
Tsujino2017	★	★	★	\	★★	\	★	★	7
Ohmura2017	★	★	★	★	★★	★	\	\	7
Lorentz2017	★	★	★	\	★	\	★	★	6
Harris2017	\	\	★	★	★★	\	★	★	6
Owari2018	★	★	★	\	★★	\	\	★	6
Fukuda2018	\	\	★	★	★★	★		★	6

## Sheet: Sheet1
study	year	tumor		hr	ll	ul	region	stage	mode	nation	outcomes
Chen et al.(M)	2015	ccRCC	GPS 1	3.57	1.79	7.15	Asia	Non-metasiatic	mGPS	China	OS
Chen et al.(M)	2015	ccRCC	GPS 2	2.54	1.03	6.29	Asia	Non-metasiatic	mGPS	China	OS
Chen et al.(M)	2015	ccRCC	mGPS 1	2.98	1.36	6.53	Asia	Non-metasiatic	mGPS	China	OS
Chen et al.(M)	2015	ccRCC	mGPS 2	1.94	0.81	4.62	Asia	Non-metasiatic	mGPS	China	OS
Baum et al.	2015	ccRCC	mGPS 1	3.6	1.57	8.23	Amarican	Non-metasiatic	mGPS	USA	OS
Fukuda(1) et al.	2018	mRCC	GPS 1	1.89	1.12	3.21	Asia	Metasiatic	GPS	Japan	OS
Fukuda(1) et al.	2018	mRCC	GPS 2	3.54	2.07	6.14	Asia	Metasiatic	GPS	Japan	OS
Fukuda(2) et al.	2018	mRCC	GPS 1	2.19	1.26	3.83	Asia	Metasiatic	GPS	Japan	OS
Fukuda(2) et al.	2018	mRCC	GPS 2	2.23	1.17	4.22	Asia	Metasiatic	GPS	Japan	OS
Tai et al.	2014	ccRCC	mGPS 1 Adjusted	4.035	1.312	12.415	Amarican	Non-metasiatic	mGPS	USA	RFS
Tai et al.	2014	ccRCC	mGPS 2 Adjusted	7.012	2.126	23.123	Amarican	Non-metasiatic	mGPS	USA	RFS
Lucca et al.	2015	ccRCC	GPS 0	reference			Europe	Non-metasiatic	GPS	Austria	DFS
Lucca et al.	2015	ccRCC	GPS 1	5.85	3.13	10.83	Europe	Non-metasiatic	GPS	Austria	DFS
Lucca et al.	2015	ccRCC	GPS 2	7.89	2.67	23.27	Europe	Non-metasiatic	GPS	Austria	DFS
Owari et al.(M)	2018	mRCC	GPS 1	1.8	1.04	2.99	Asia	Metasiatic	GPS	Japan	CSS
Owari et al.(M)	2018	mRCC	GPS 2	3.5	1.68	7.4	Asia	Metasiatic	GPS	Japan	CSS
